# Supplementary material for: Serum diamine oxidase activity derived from responce to chemotherapy affects adverse events and serum amino acid levels
Source: Research Square preprint supplement (doi:10.21203/rs.3.rs-1460065/v1), 2022-04-12
Supplement: Supplementary file 1 [file 1ba0358ffd6dbc90edc98cfb.docx]

| **Online Resource 4** QLQ-C30 assessment in the high and low DAO groups | | | |
| --- | --- | --- | --- |
|  | Average (SD) | | *p*-Value |
| DAO ≥6.5 units/L | DAO <6.5 units/L |
| Global health function |  |  |  |
|  |  |  |
| First visit | 51.23 (19.84) | 52.17 (26.14) | 0.886 |
| After 4 weeks | 76.85 (22.68) | 73.55 (25.7) | 0.632 |
| Physical function |  |  |  |
|  |  |  |
| First visit | 84.69 (16.52) | 85.22 (11.88) | 0.899 |
| After 4 weeks | 93.33 (7.396) | 89.86 (9.821) | 0.160 |
| Role function |  |  |  |
|  |  |  |
| First visit | 81.48 (19.79) | 79.71 (26.57) | 0.789 |
| After 4 weeks | 88.27 (13.72) | 81.88 (22.42) | 0.223 |
| Emotional function |  |  |  |
|  |  |  |
| First visit | 83.95 (14.23) | 76.45 (19.57) | 0.124 |
| After 4 weeks | 90.12 (12.88) | 87.68 (16.26) | 0.556 |
| Cognitive function |  |  |  |
|  |  |  |
| First visit | 91.36 (12.55) | 83.33 (21.32) | 0.105 |
| After 4 weeks | 92.59 (14.12) | 88.41 (11.72) | 0.265 |
| Social function |  |  |  |
|  |  |  |
| First visit | 88.89 (13.07) | 73.91 (31.31) | 0.028* |
| After 4 weeks | 91.98 (17.52) | 86.96 (17.38) | 0.316 |
| Fatigue |  |  |  |
|  |  |  |
| First visit | 17.68 (16.37) | 36.23 (19.33) | 0.001* |
| After 4 weeks | 16.05 (16.69) | 28.51 (21.44) | 0.025* |
| Nausea and vomiting |  |  |  |
|  |  |  |
| First visit | 12.35 (17.66) | 15.22 (13.21) | 0.524 |
| After 4 weeks | 5.556 (9.245) | 11.59 (15.44) | 0.094 |
| Pain |  |  |  |
|  |  |  |
| First visit | 16.67 (16.67) | 17.39 (24.86) | 0.903 |
| After 4 weeks | 7.407 (12.52) | 7.971 (14.1) | 0.882 |
| Dyspnea |  |  |  |
|  |  |  |
| First visit | 19.75 (23.13) | 15.94 (24.35) | 0.573 |
| After 4 weeks | 13.58 (16.69) | 17.39 (17.03) | 0.429 |
| Insomnia |  |  |  |
|  |  |  |
| First visit | 20.99 (24.72) | 34.78 (30.94) | 0.086 |
| After 4 weeks | 17.28 (26.75) | 33.33 (30.15) | 0.025* |
| Appetite loss |  |  |  |
|  |  |  |
| First visit | 20.99 (26.39) | 23.19 (25.49) | 0.767 |
| After 4 weeks | 11.11 (20.67) | 17.39 (31.57) | 0.403 |
| Constipation |  |  |  |
|  |  |  |
| First visit | 13.58 (19.08) | 20.29 (27.96) | 0.321 |
| After 4 weeks | 8.642 (14.89) | 13.04 (21.88) | 0.404 |
| Diarrhea |  |  |  |
|  |  |  |
| First visit | 8.642 (14.89) | 20.29 (19.43) | 0.02* |
| After 4 weeks | 16.05 (23.33) | 15.94 (22.18) | 0.987 |
| Financial difficulties |  |  |  |
|  |  |  |
| First visit | 16.05 (19.33) | 23.19 (30.87) | 0.325 |
| After 4 weeks | 16.05 (29.77) | 11.59 (23.8) | 0.566 |
| *SD* standard deviation, *DAO* diamine oxidase  **p* <0.05 | | | |
